# Supplementary material for: Three-Dimensional Visualization of APEX2-Tagged Erg11 in Saccharomyces cerevisiae Using Focused Ion Beam Scanning Electron Microscopy
Source: PubMed Central journal article supplement (PMC7002314; doi:10.1128/msphere.00981-19), 2020-02-05

**A**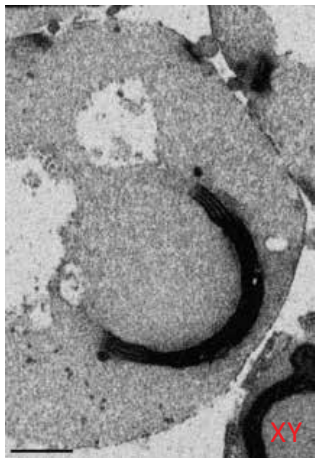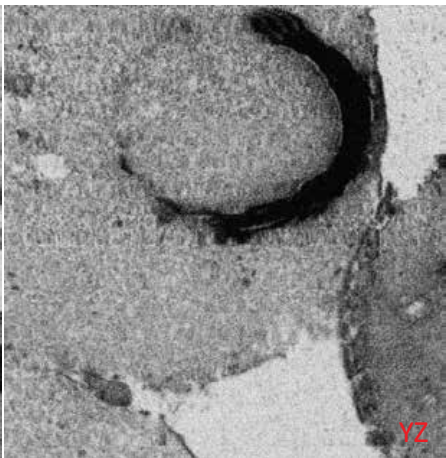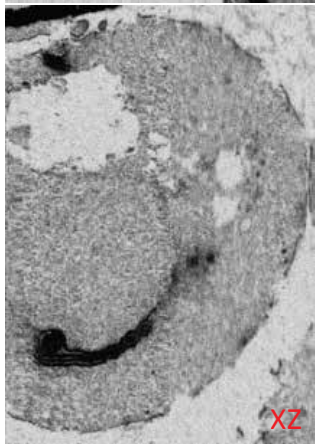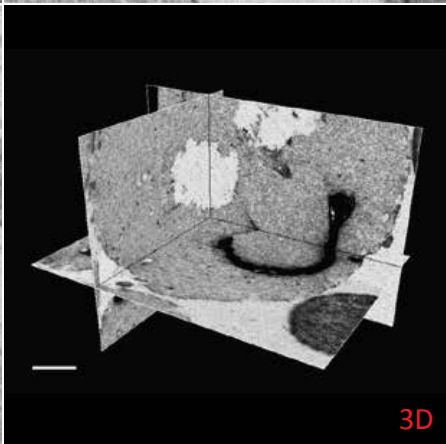**B**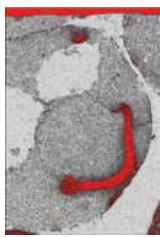**D**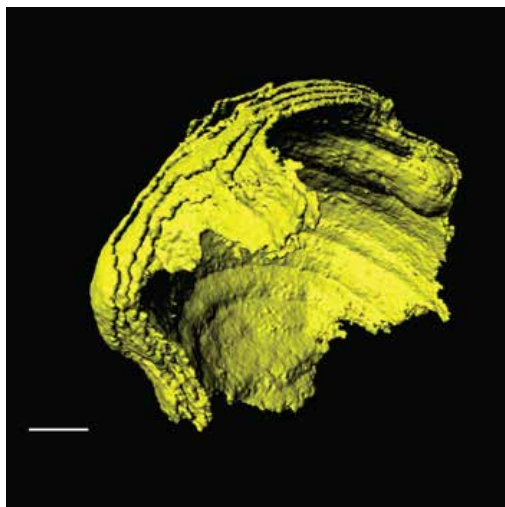**C**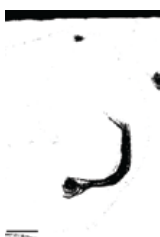**E**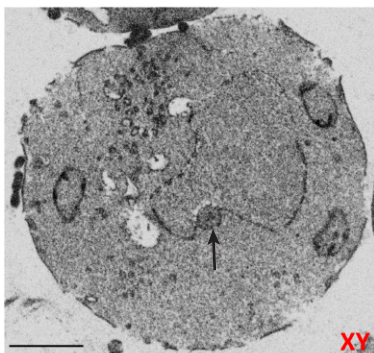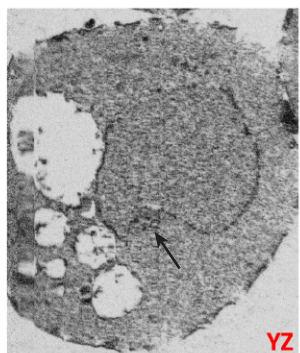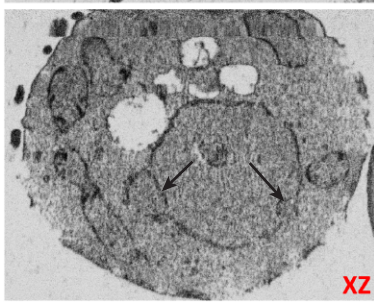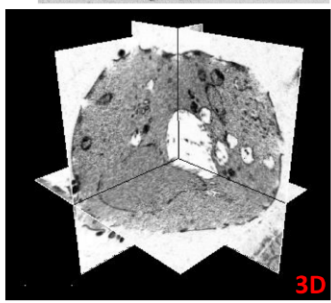

Supplement: mSphere.00981-19-sf001.pdf [file mSphere.00981-19-sf001.pdf]
